# Supplementary material
Source: PubMed Central journal article supplement (PMC3742361)
Supplement: NIHMS452189-supplement-ESI.pdf [file NIHMS452189-supplement-ESI.pdf]

## Supplementary Figures

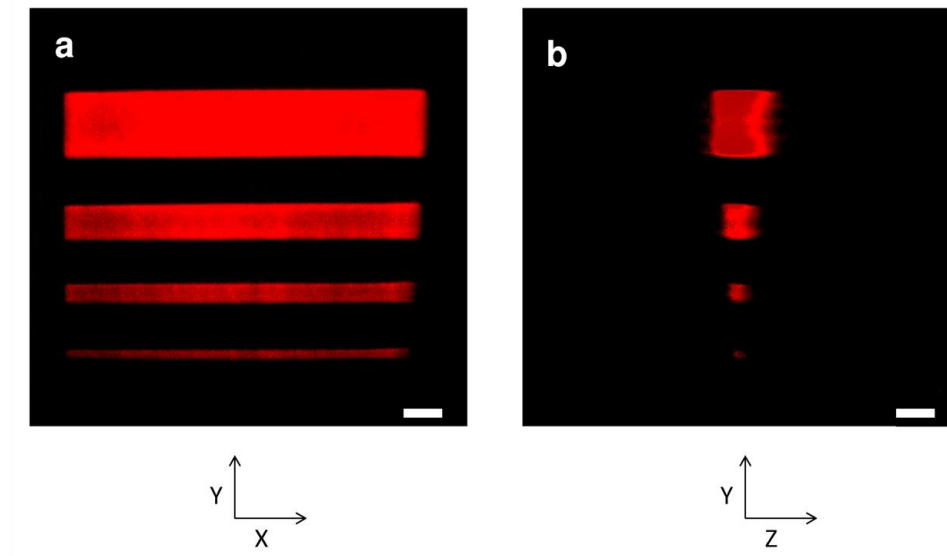

**Supplementary Figure 1: 3D Patterns of PEG-RGDS Vary in Width and Height.** PEG-RGDS micropatterns within a PEG-PQ hydrogel are shown. (a) Straight on (XY) view of micropatterns showing a constant 500  $\mu\text{m}$  length and various widths of 100, 50, 25, and 10  $\mu\text{m}$ . (b) Cross sectional (YZ) view of micropatterns showing that the patterns have controlled widths and heights. From top to bottom the YZ dimensions of the patterns are 100 x 100  $\mu\text{m}$ , 50 x 50  $\mu\text{m}$ , 25 x 25  $\mu\text{m}$ , and 10 x 10  $\mu\text{m}$ . Scale bar = 50  $\mu\text{m}$ .
